# Supplementary material for: A single-stage anion exchange separation method for Cd isotopic analysis in geological and environmental samples by MC-ICP-MS
Source: Royal Society of Chemistry journal article supplement (doi:10.1039/d3ja00234a), 2023-01-01

# A single-stage anion exchange separation method for Cd isotopic analysis in geological and environmental samples by MC-ICP-MS

Qiao-Hui Zhong<sup>1, 2, 3</sup>, Lu Yin<sup>4</sup>, Jie Li<sup>1, 2,\*</sup>, Yue-Xing Feng<sup>5,7</sup>, Neng-Ping Shen<sup>6</sup>, Bing-Yu Peng<sup>1,2,3</sup>, Zhao-Yang Wang<sup>1,2,3</sup>

- (1) State Key Laboratory of Isotope Geochemistry, Guangzhou Institute of Geochemistry, Chinese Academy of Sciences, Guangzhou, 510640, China;
- (2) CAS Center for Excellence in Deep Earth Science, Guangzhou, 510640, China;
- (3) College of Earth and Planetary Sciences, University of Chinese Academy of Sciences, Beijing, 100101, China;
- (4) Hebei Key Laboratory of Strategic Critical Mineral Resources, Hebei GEO University, Shijiazhuang, 050031, China;
- (5) Southern Marine Science and Engineering Guangdong Laboratory (Zhuhai), Zhuhai, 519082, PR China;
- (6) State Key Laboratory of Ore Deposit Geochemistry, Institute of Geochemistry, Chinese Academy of Sciences, Guiyang, 550081, China;
- (7) Radiogenic Isotope Facility, School of Environment, The University of Queensland, Qld 4072, Australia

\* Corresponding author: Jie Li, State Key Laboratory of Isotope Geochemistry, Guangzhou Institute of Geochemistry, Chinese Academy of Sciences, Guangzhou 510640, China

*E-mail address: jieli@gig.ac.cn (J. Li)*

Fig. S1. Elution curves of Cd purification procedures using different reagents. Corresponding to Fig. 1a-1d, only Cd and its recovery rate at each step is included.

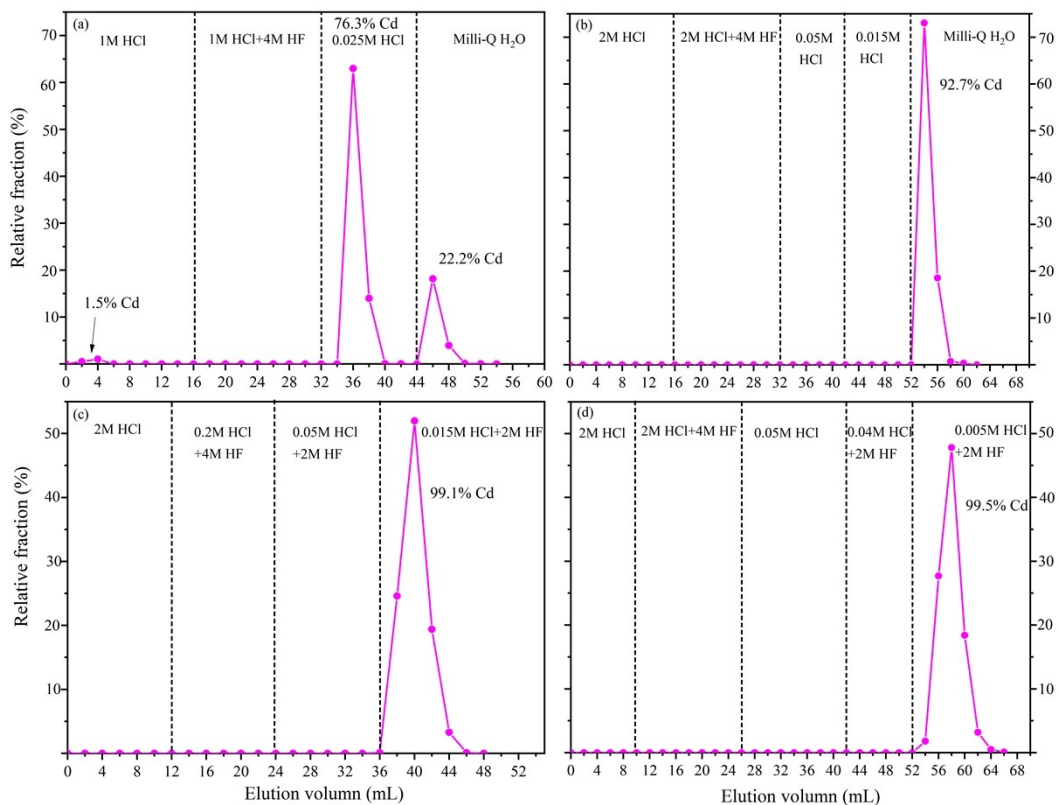

Supplement: d3ja00234a1.pdf [file d3ja00234a1.pdf]
